# Supplementary material for: From California dreaming to California data: Challenging historic models for landfill CH4 emissions
Source: Oxford University Press journal article supplement (doi:10.12952/journal.elementa.000051), 2015-01-01
Supplement: elementa_000051_s004.docx [file elementa_000051_s004.docx]

**
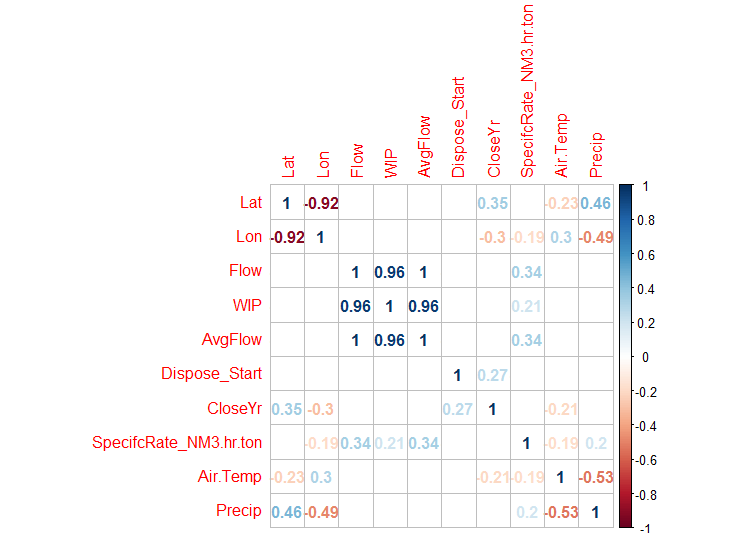
**

**Figure S4.** Correlations across the entire CA landfill database for sites with gas recovery data (n=129). Shown in the Figure is the Pearson correlation with the numbers showing only those correlations that were significant at the 95% confidence interval (P=0.05). Note the significant correlation (r=0.96) between WIP (waste in place) with flow and average annual flow of landfill gas. There were no other significant relationships observed.
