# Supplementary material for: From California dreaming to California data: Challenging historic models for landfill CH4 emissions
Source: Oxford University Press journal article supplement (doi:10.12952/journal.elementa.000051), 2015-01-01
Supplement: elementa_000051_s006.docx [file elementa_000051_s006.docx]

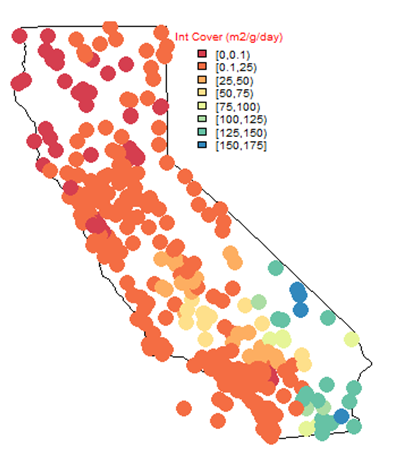


**Figure S6**. Estimated annual area normalized intermediate cover emissions for all California landfills (g m-2 d-1). Note the geographical clustering of the results, which is similar to the trends in the annual climate variability in California (see **Figure S7**).
