# Supplementary material for: From California dreaming to California data: Challenging historic models for landfill CH4 emissions
Source: Oxford University Press journal article supplement (doi:10.12952/journal.elementa.000051), 2015-01-01
Supplement: elementa_000051_s008.docx [file elementa_000051_s008.docx]

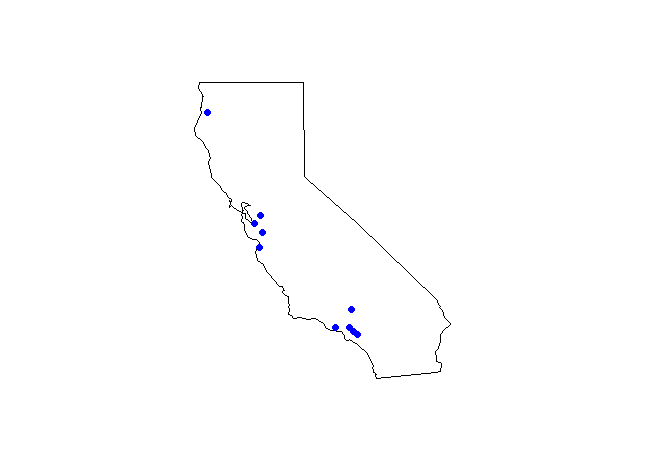


**Figure S8.** Distribution of the 10 landfill sites in California where field data were compared to the CALMIM model predictions (Figure 4 in manuscript).
