# Supplementary material for: From California dreaming to California data: Challenging historic models for landfill CH4 emissions
Source: Oxford University Press journal article supplement (doi:10.12952/journal.elementa.000051), 2015-01-01
Supplement: elementa_000051_s012.docx [file elementa_000051_s012.docx]

**Table S2:** Waste in place as a function of LFG recovery

|  | **WIP 2010 (tons)** | **% of WIP in California** |
| --- | --- | --- |
| Total WIP 2010 LFG Systems | 1,223,508,856 | 89.3% |
| Total WIP 2010 without LFG recovery | 146,390,847 | 10.7% |
| Total WIP | 1,369,899,702 | 100% |

This table details the division of the waste in place (WIP) with and without landfill gas recovery in 2010. As seen in the table, 89.3% of the WIP is under landfill gas recovery in California.
