# Supplementary material for: From California dreaming to California data: Challenging historic models for landfill CH4 emissions
Source: Oxford University Press journal article supplement (doi:10.12952/journal.elementa.000051), 2015-01-01
Supplement: elementa_000051_s015.docx [file elementa_000051_s015.docx]

### Table S5. Comparison of the top ten CARB emitting California sites.

| SWIS | Latitude | Longitude | Site Name | ARB 2010 estimated emissions  (Mg CH4/yr) | CALMIM  (Mg CH4/yr) | % Final Cover | % Intermediate Area | Recovery? |
| --- | --- | --- | --- | --- | --- | --- | --- | --- |
| 19-AA-0053 | 34.02 | -118 | Puente Hills LF | 29,537 | 3,012.09 | 81.00 | 17 | True |
| 30-AB-0035 | 33.934 | -117.8 | Olinda Alpha SLF | 13,105 | 6,259.49 | 0.00 | 98 | True |
| 01-AA-0009 | 37.754 | -121.7 | Altamont LF | 12,627 | 1,496.21 | 15.32 | 80 | True |
| 30-AB-0360 | 33.718 | -117.7 | Frank R. Bowerman | 9,692 | 5,403.08 | 0.00 | 96 | True |
| 34-AA-0001 | 38.517 | -121.2 | Kiefer LF | 9,310 | 3,404.48 | 13.60 | 82 | True |
| 37-AA-0010 | 32.603 | -117 | Otay SWLF | 8,323 | 2,832.48 | 9.57 | 86 | True |
| 19-AE-0001 | 33.794 | -118.3 | Palos Verdes | 7,040 | 0.00 | 100.00 | - | True |
| 19-AR-0008 | 34.24 | -118.4 | Bradley Ave East & West | 6,778 | 0.00 | 100.00 | - | True |
| 37-AA-0020 | 32.856 | -117.2 | Miramar SWLF | 6,733 | 15,657.18 | 0.00 | 98 | True |
| 19-AA-0012 | 34.158 | -118.2 | Scholl Canyon LF | 6,670 | 4,974.12 | 28.64 | 69 | True |

Notes: Percent cover area was calculated from the given intermediate/final as well as waste footprint areas in the database.
